# Supplementary material
Source: publisher figshare collection journal article supplement (https://acs.figshare.com/ndownloader/files/24148584)
Supplement: Supplementary file 1 [file 24148584]

# Supporting Information for: Influence of External NaCl Salt on Membrane Rigidity of Neutral DOPC Vesicles

Judith U. De Mel,<sup>1</sup> Sudipta Gupta,<sup>1\*</sup> Rasangi M. Perera,<sup>1</sup> Ly Ngo,<sup>1</sup> Piotr Zolnierczuk,<sup>2</sup> Markus Bleuel,<sup>3</sup> Sai Venkatesh Pingali,<sup>4</sup> and Gerald J. Schneider<sup>1,5\*</sup>

<sup>1</sup>*Department of Chemistry, Louisiana State University, Baton Rouge, Louisiana 70803, United States*

<sup>2</sup>*Jülich Centre for Neutron Science (JCNS), Outstation at SNS, POB 2008, 1 Bethel Valley Road, Oak Ridge, Tennessee 37831, United States*

<sup>3</sup>*NIST Center for Neutron Research, National Institute of Standards and Technology, Gaithersburg, Maryland 20899-8562, United States*

<sup>4</sup>*Neutron Sciences Directorate, Oak Ridge National Laboratory (ORNL), POB 2008, 1 Bethel Valley Road, Oak Ridge, Tennessee 37831, United States*

<sup>5</sup>*Department of Physics & Astronomy, Louisiana State University, Baton Rouge, Louisiana 70803, United States*

## Table of Contents

Page S2: Figure S1. Steps for vesicle preparation.

Page S3: Figure S2. Viscosity of different DOPC suspensions in D<sub>2</sub>O solutions as a function of temperature.

Page S4: Figure S3. Viscosity of 5 wt% DOPC vesicles in D<sub>2</sub>O, in 150 mM NaCl and in 470 mM NaCl as a function of temperature.

Page S4: Figure S4. Cryo-TEM images for 470 mM NaCl in DOPC.

Page S5: Figure S5. SAXS diffraction data for 0, 150, and 470 mM samples.

## Vesicle Preparation

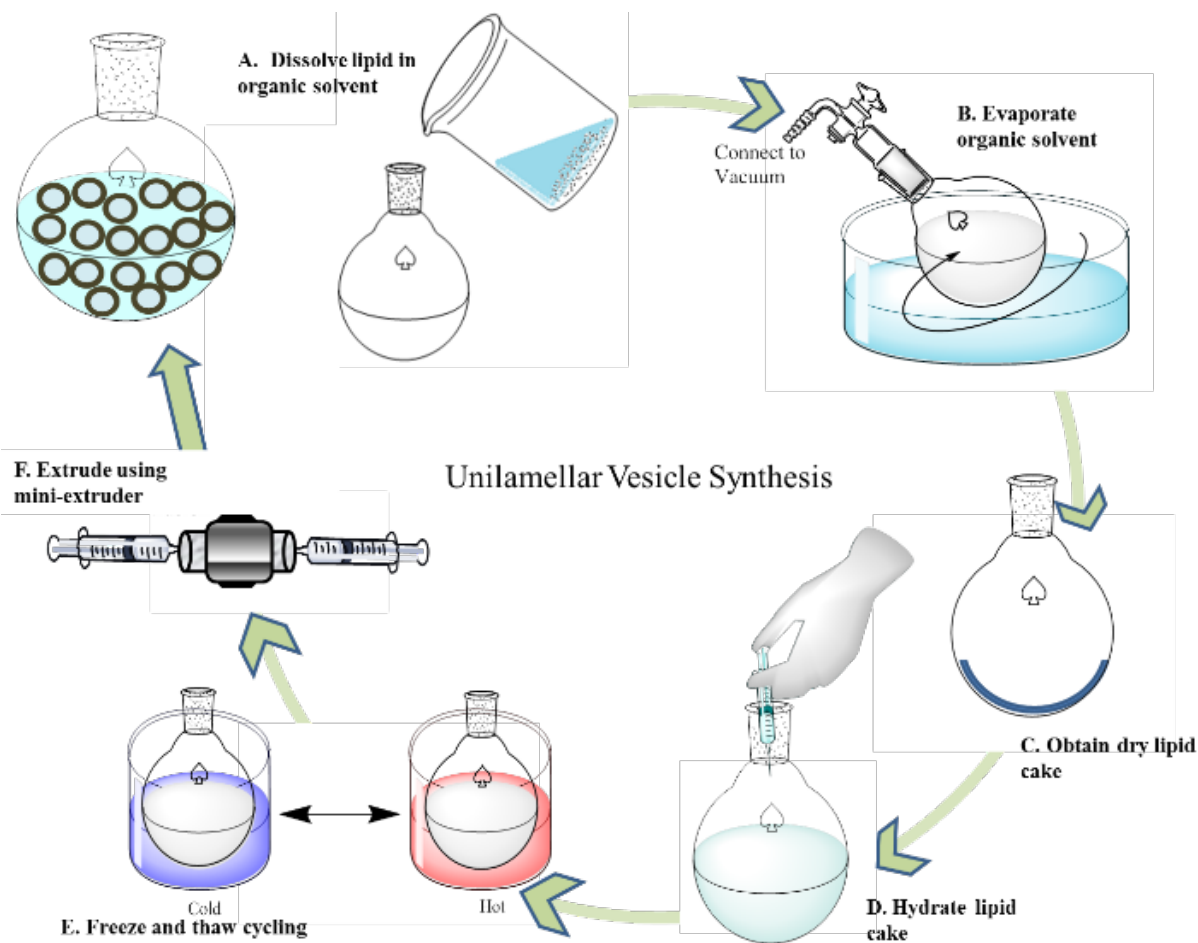

Figure S1. Schematic diagram depicting the steps for vesicle preparation

## Macroscopic viscosity

### Viscosity data of DOPC vesicles in D<sub>2</sub>O with concentration and temperature variation

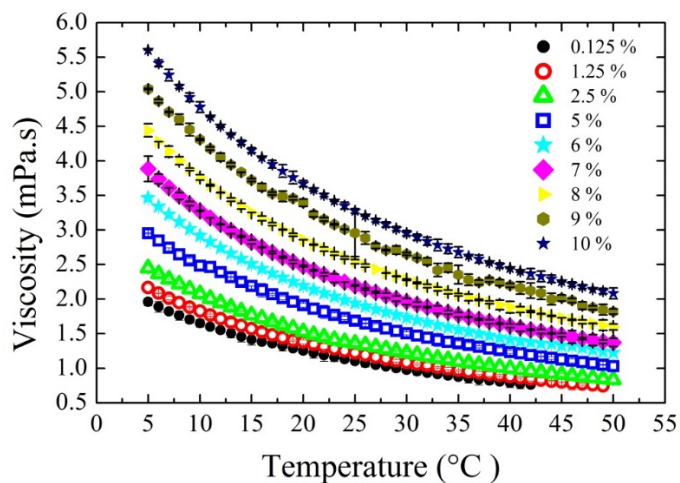

*Figure S2. Viscosity of different DOPC vesicles in D<sub>2</sub>O solutions as a function of temperature (DOPC concentrations are expressed in wt%)*

The dynamic viscosities of the solutions were measured using a microviscometer (Anton Paar, Lovis 2000M) which employs the Höppler principle. H<sub>2</sub>O was used as a reference standard. It can be observed that the viscosity of the DOPC vesicle solutions in D<sub>2</sub>O increases with the concentration and decreases with temperature systematically.

## Viscosity of DOPC vesicles in D<sub>2</sub>O and NaCl

Dynamic viscosity was measured for a concentration series of DOPC vesicle and salt suspensions in D<sub>2</sub>O by a microviscometer (Anton Paar, Lovis 2000M).

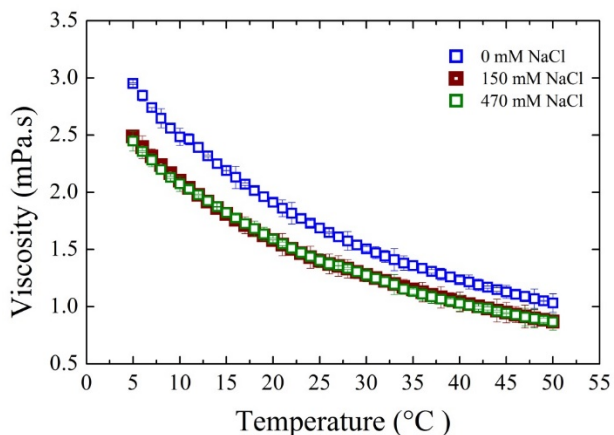

*Figure S3. Viscosity of 5 wt% DOPC vesicles in D<sub>2</sub>O (blue), in 150 mM NaCl (brown) and in 470 mM NaCl (green) as a function of temperature*

Viscosity of the DOPC vesicle solution reduces in the presence of NaCl in comparison to pure D<sub>2</sub>O. Viscosity decreases with temperature systematically.

## Cryo-TEM images

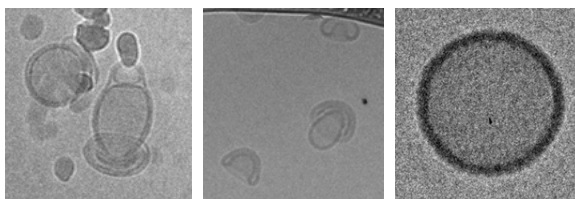

*Figure S4. Cryo-TEM images for 470 mM NaCl in DOPC*

The cryo-TEM images for 470 mM depict mixed or fused vesicle structures.

## Caille analysis

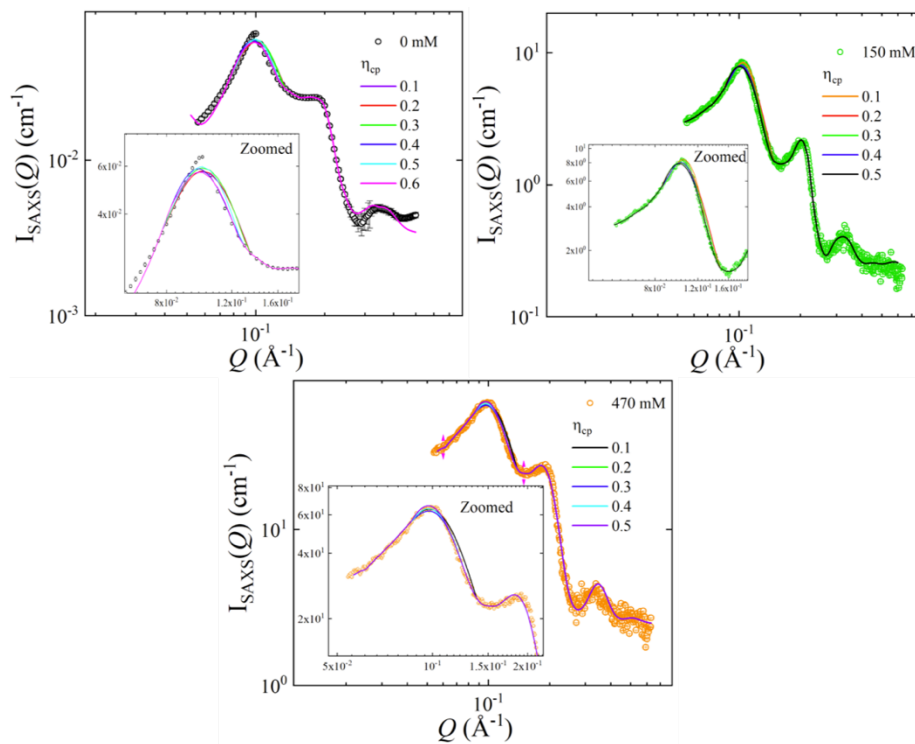

Figure S5. SAXS data for 0, 150, and 470 mM NaCl samples modeled with different Caille parameters as shown in the legends.

## NSE analysis

The Zilman-Granek (ZG) decay rate as a function of momentum transfer,  $Q$ , is presented in Figure S6.

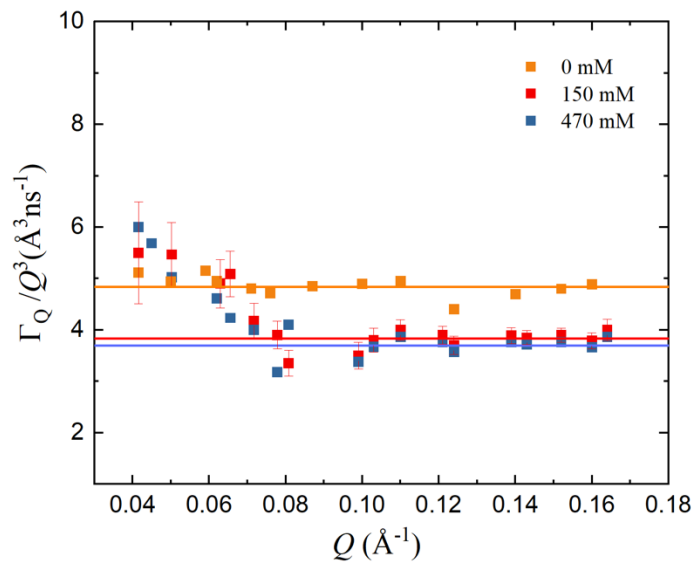

Figure S6. Variation of ZG decay rate,  $\Gamma_Q$ , as function of  $Q$  for different NaCl concentration. In presence of salt,  $\Gamma_Q / Q^3$  is constant, for  $Q \geq 0.1 \text{ \AA}^{-1}$ .
